# Supplementary material
Source: PubMed Central journal article supplement (PMC5889002)

## Supplement

**Table S1:** The HIV-positive prevalence of detectable viremia (PDV<sub>+</sub>), the population prevalence of detectable viremia (PDV<sub>P</sub>), and the HIV prevalence by sex in 2011, 2013, and 2014.

|                        | Females  |               | Males    |               |
|------------------------|----------|---------------|----------|---------------|
|                        | Estimate | 95% CI        | Estimate | 95% CI        |
| <i>PDV<sub>+</sub></i> |          |               |          |               |
| 2011                   | 71.80    | (67.36–76.49) | 77.80    | (67.65–89.40) |
| 2013                   | 62.01    | (57.61–66.72) | 70.33    | (60.72–81.39) |
| 2014                   | 55.30    | (51.22–59.67) | 67.18    | (57.06–78.94) |
| <i>PDV<sub>P</sub></i> |          |               |          |               |
| 2011                   | 21.35    | (20.19–22.56) | 14.58    | (13.11–16.16) |
| 2013                   | 20.09    | (18.85–21.39) | 17.60    | (15.67–19.70) |
| 2014                   | 19.23    | (18.01–20.51) | 16.18    | (14.31–18.22) |
| <i>HIV Prevalence</i>  |          |               |          |               |
| 2011                   | 30.56    | (29.18–31.99) | 19.63    | (17.92–21.45) |
| 2013                   | 33.72    | (32.12–35.39) | 25.50    | (23.16–28.02) |
| 2014                   | 35.61    | (33.96–37.33) | 27.05    | (24.62–29.67) |

**Table S2:** Regression results showing the relative odds (odds ratio) of a detectable viral load for the HIV-positive and HIV-negative population (PDV<sub>P</sub>) by sex, adjusting for year and age.

|                  | Females |                |         |         |                |         | Males   |                |         |         |                |         |
|------------------|---------|----------------|---------|---------|----------------|---------|---------|----------------|---------|---------|----------------|---------|
|                  | Model 1 |                |         | Model 2 |                |         | Model 3 |                |         | Model 4 |                |         |
|                  | OR      | 95% CI         | p-value |
| Year (Ref: 2011) |         |                |         |         |                |         |         |                |         |         |                |         |
| 2013             | 0.921   | (0.858, 0.989) | 0.024   | 0.916   | (0.853, 0.983) | 0.015   | 1.131   | (0.989, 1.293) | 0.073   | 1.185   | (1.031, 1.362) | 0.017   |
| 2014             | 0.868   | (0.804, 0.937) | <0.001  | 0.846   | (0.784, 0.913) | <0.001  | 1.050   | (0.901, 1.223) | 0.534   | 1.044   | (0.893, 1.221) | 0.586   |
| Age (>25 years)  |         |                |         | 2.213   | (1.998, 2.452) | <0.001  |         |                |         | 7.438   | (6.081, 9.098) | <0.001  |
| Constant         | 0.296   | (0.28, 0.314)  | <0.001  | 0.170   | (0.154, 0.187) | <0.001  | 0.155   | (0.139, 0.171) | <0.001  | 0.040   | (0.033, 0.049) | <0.001  |
| HIV tests, N     | 15,337  |                |         | 15,337  |                |         | 6,830   |                |         | 6,830   |                |         |
| Participants, N  | 10,701  |                |         | 10,701  |                |         | 5,618   |                |         | 5,618   |                |         |

**Figure S1:** Shows the important role of HIV prevalence in evaluating the potential for HIV transmission at the population level. Consider two hypothetical communities, A and B, which have 10 residents and the same HIV-positive prevalence of detectable viremia ( $PDV_+$ ) and rate of sexual contact. In Community A, the HIV prevalence is 20% and in Community B it is 40%. Multiplying the  $PDV_+$  (50%) by the HIV prevalence gives a population prevalence of detectable viremia ( $PDV_p$ ) of 10% for Community A and 20% for Community B. Thus, we expect the potential for HIV transmission to be higher in Community B because there are more HIV-infected people with detectable viral loads.

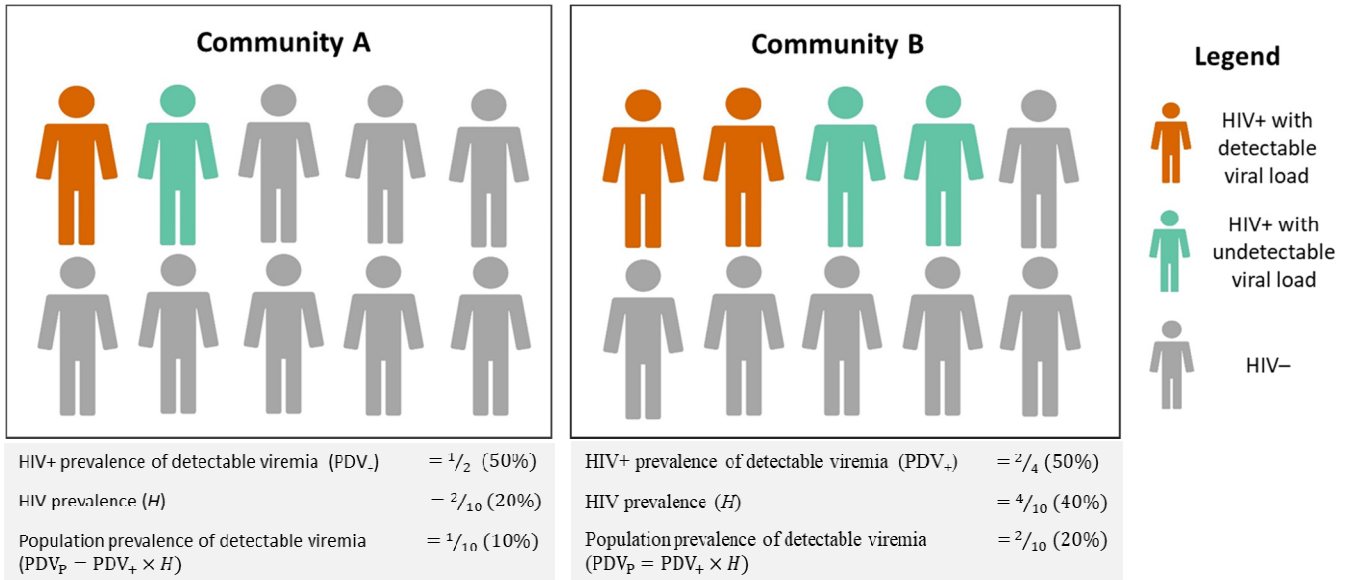

Supplement: cix976_suppl_supplement.pdf [file cix976_suppl_supplement.pdf]
